# Supplementary material
Source: PubMed Central journal article supplement (PMC4509421)

# **Supporting Information for:**

## **Simulating the distance distribution between spin-labels attached to proteins**

***Shahidul M. Islam,<sup>1</sup> and Benoît Roux<sup>1,2,\*</sup>***

<sup>1</sup>Department of Biochemistry and Molecular Biology

<sup>2</sup>Department of Chemistry

University of Chicago

Chicago, IL

USA 60637

\*corresponding author E-mail: [roux@uchicago.edu](mailto:roux@uchicago.edu)

**Figure S1.** Time dependence of the dihedral angles of  $RX_{i,i+4}$  attached to a polyalanine  $\alpha$ -helix

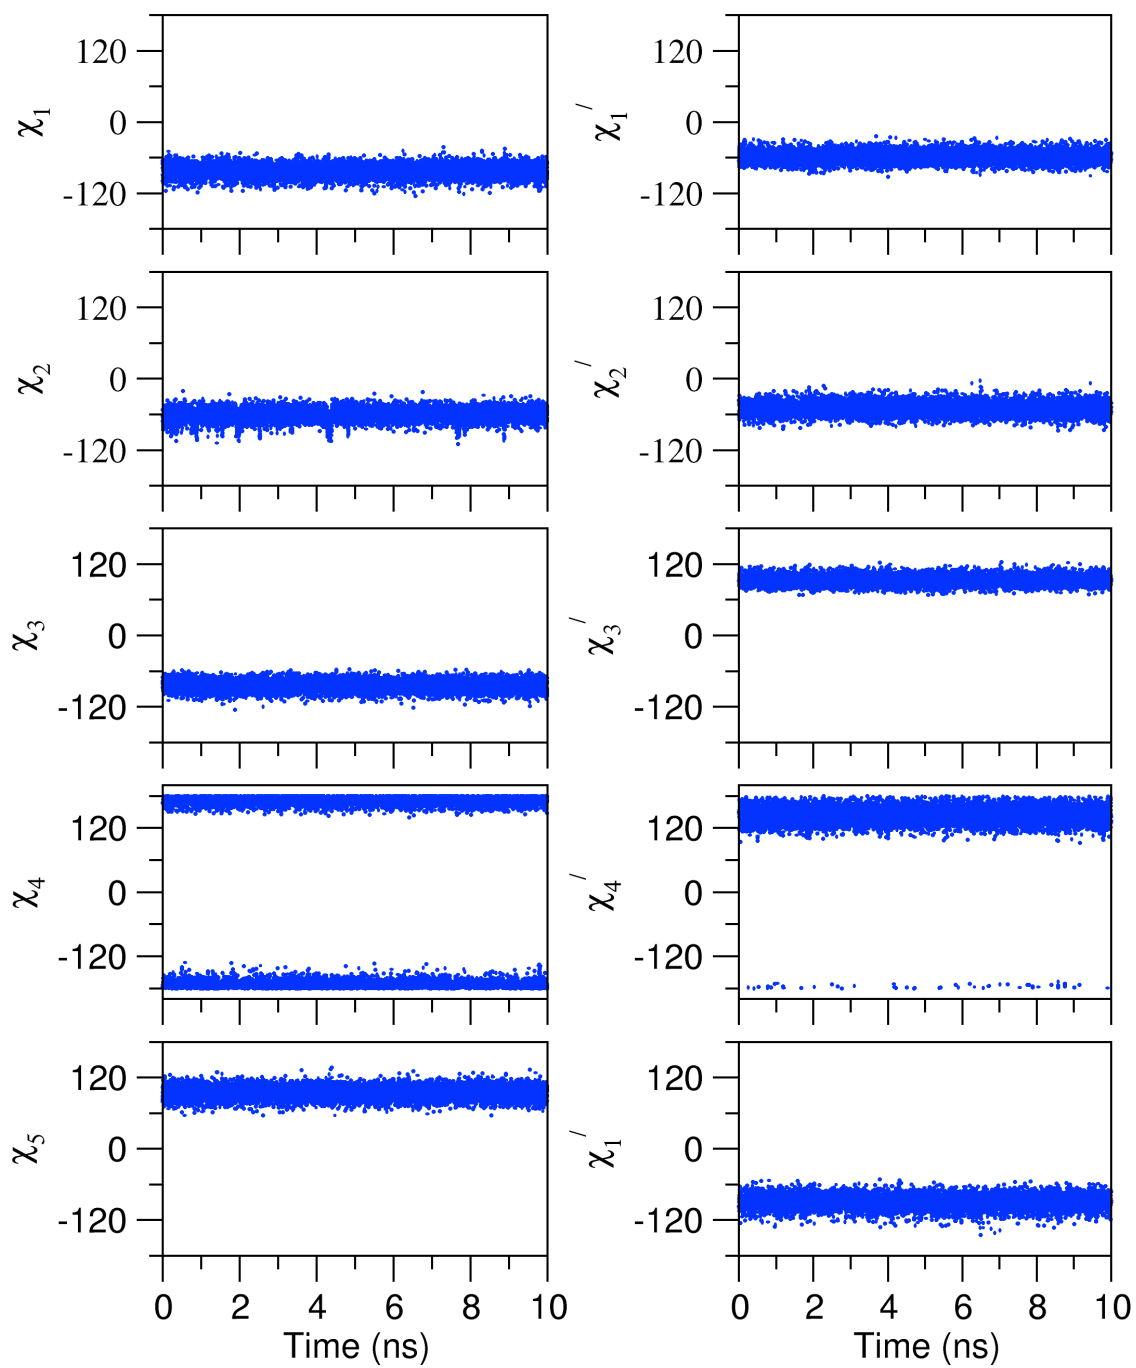

**Figure S2.** Time dependence of the dihedral angles of  $RX_{i,i+3}$  attached to a polyaniline  $\alpha$ -helix

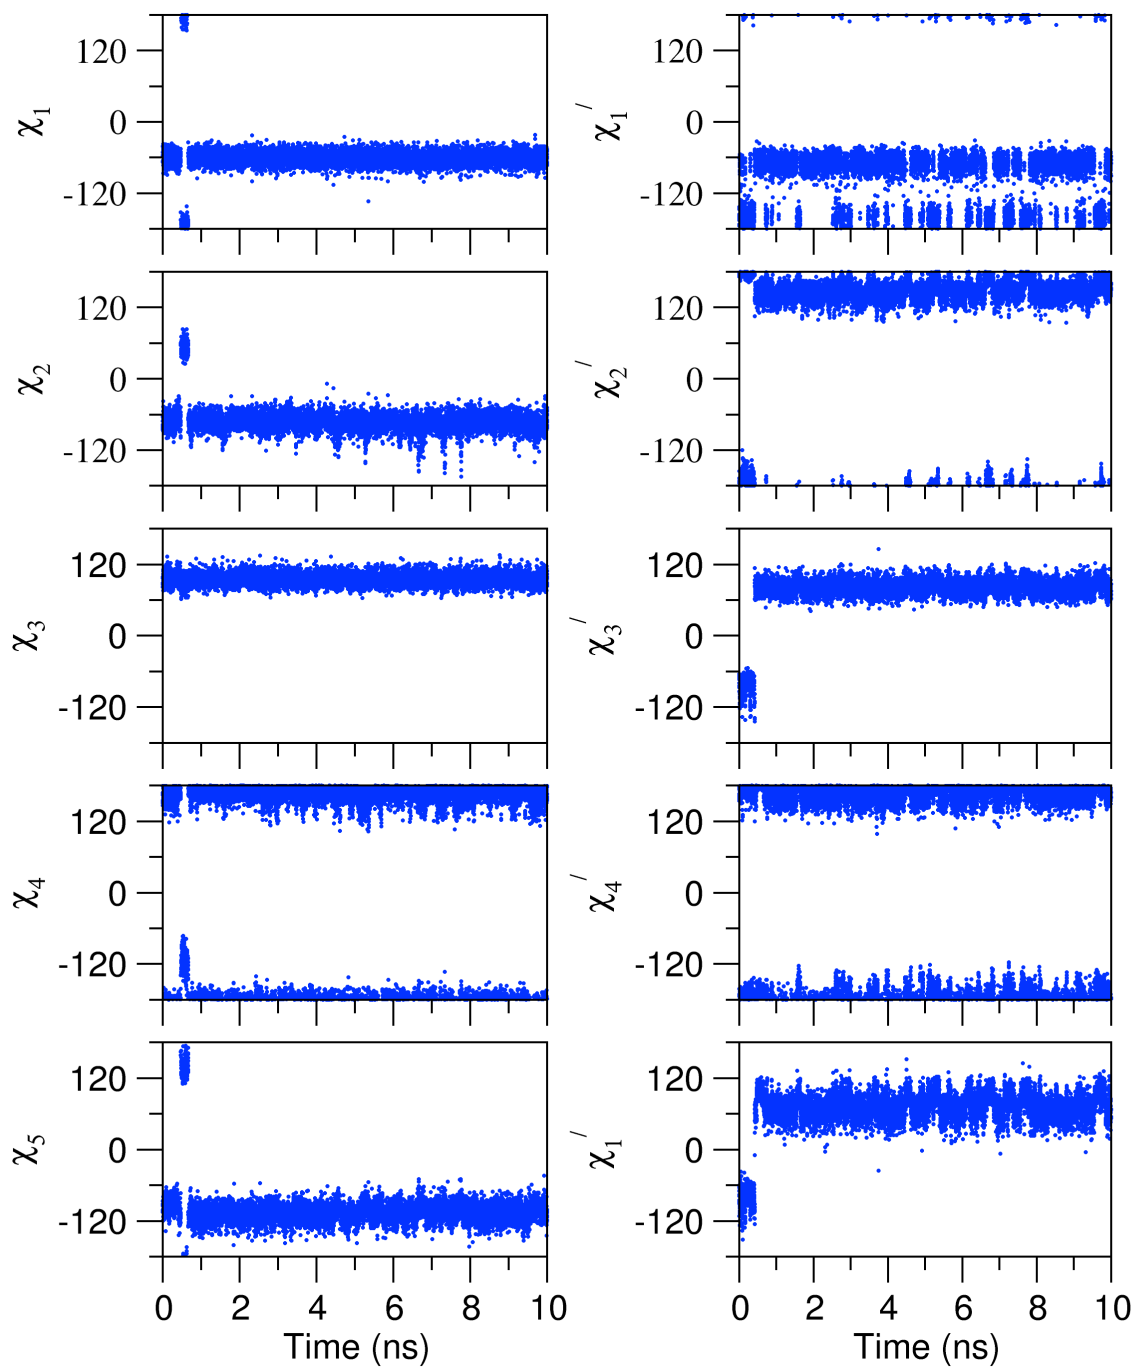

**Figure S3.** Time dependence of the N-C $\alpha$ -C-N dihedral angle ( $\psi$ ) at position  $i$  when RX $_{i,i+3}$  is attached to a polyaniline  $\alpha$ -helix. In this case,  $i = 8$ .

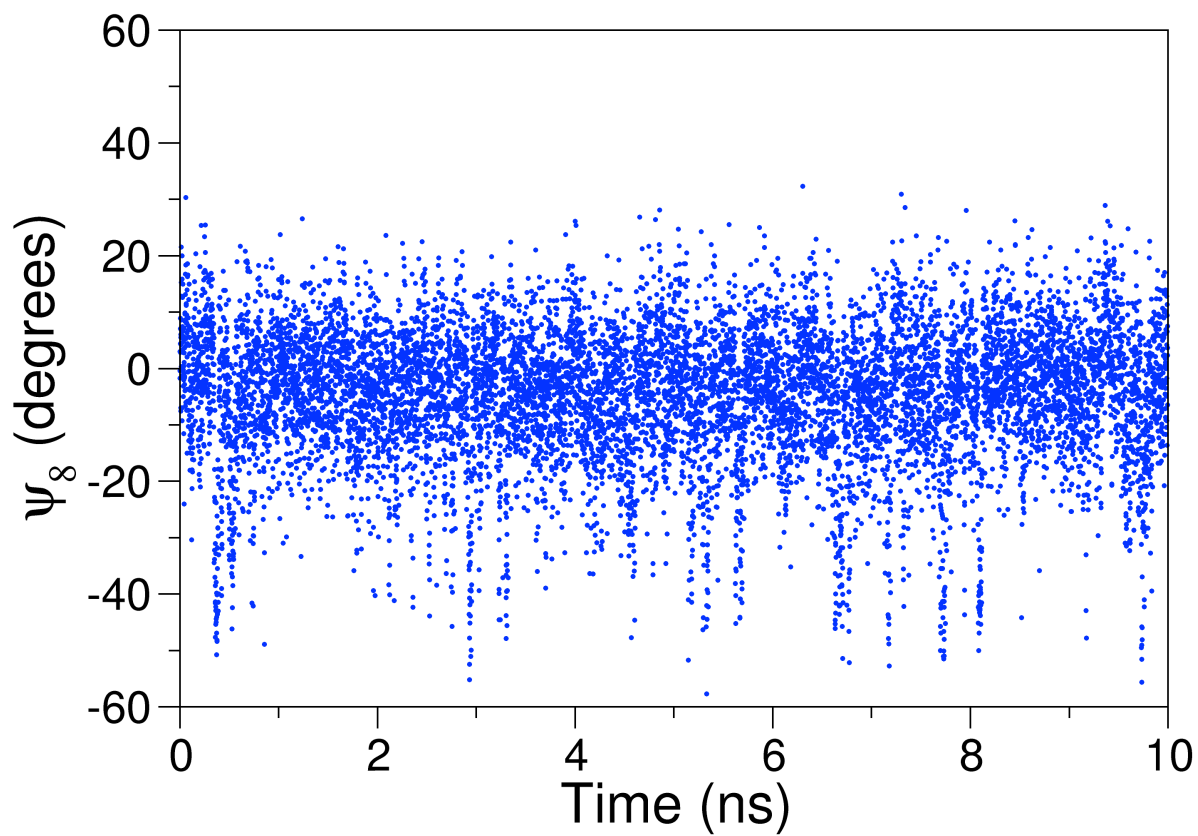

**Figure S4.** The dynamics of the nitroxide oxygen of the R1 with respect to the  $C_{\alpha}$  atom.

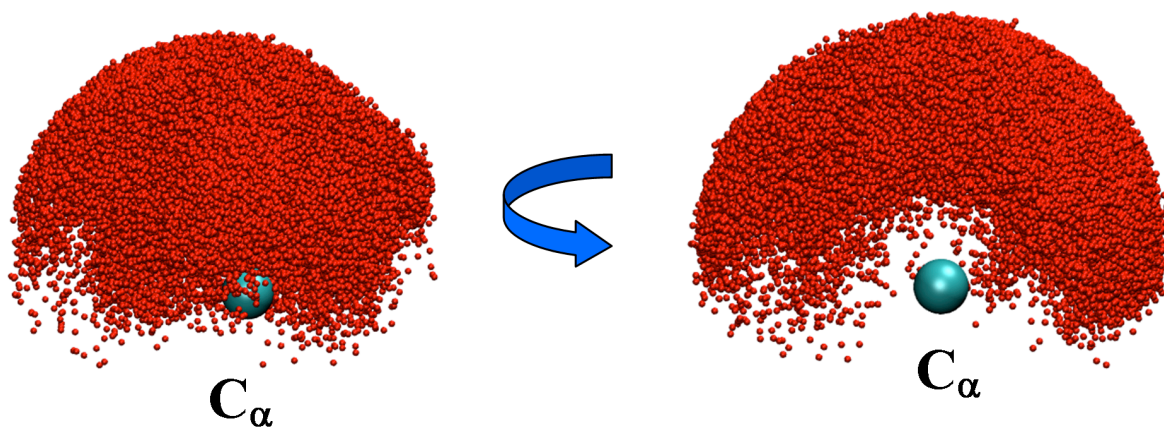

**Figure S5.** Simplified dummy OND and dummy CBD is attached to  $C_{\alpha}$  atom of Glycine.

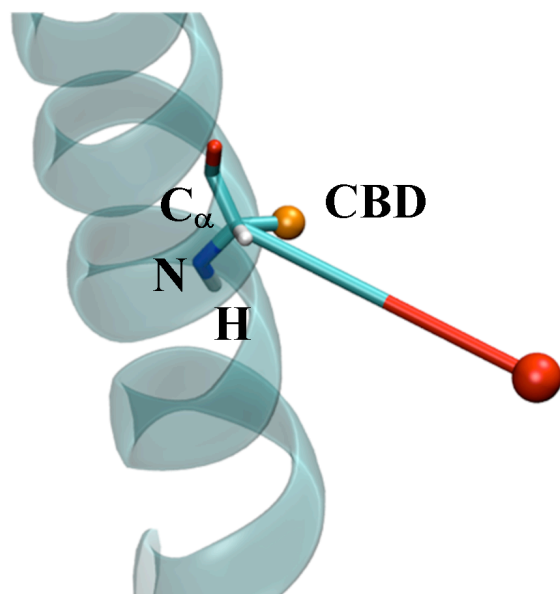

**Figure S6.** Comparison of the spin-spin distance histograms obtained from 5ns MDDS simulation of T4 lysozyme (red line) and experiment (black line).

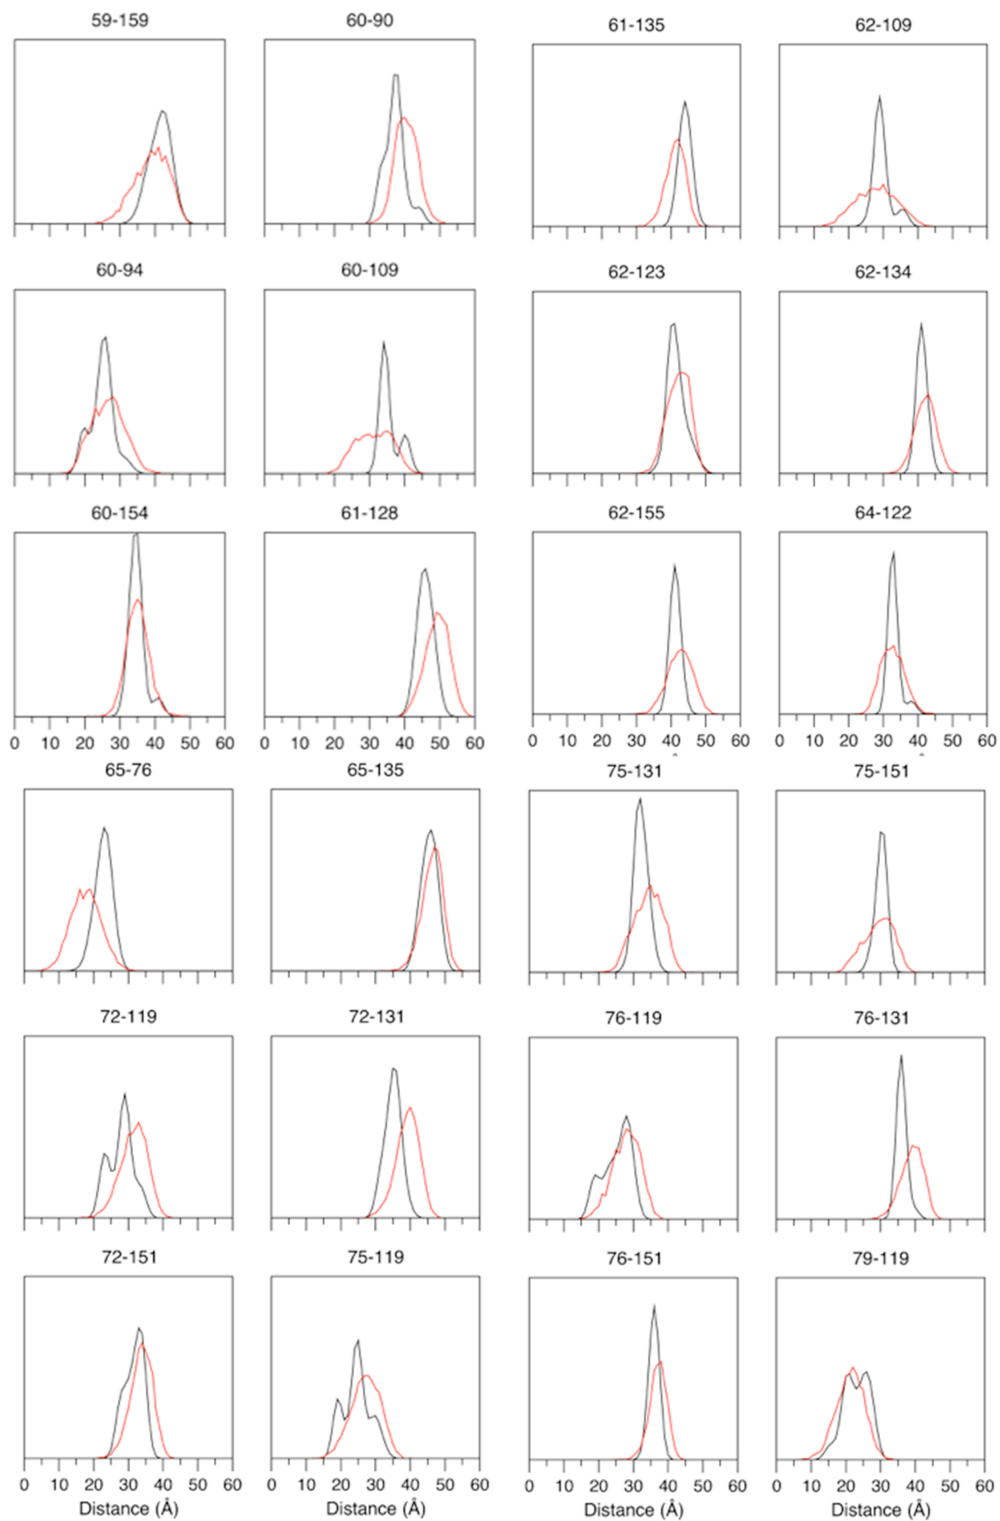

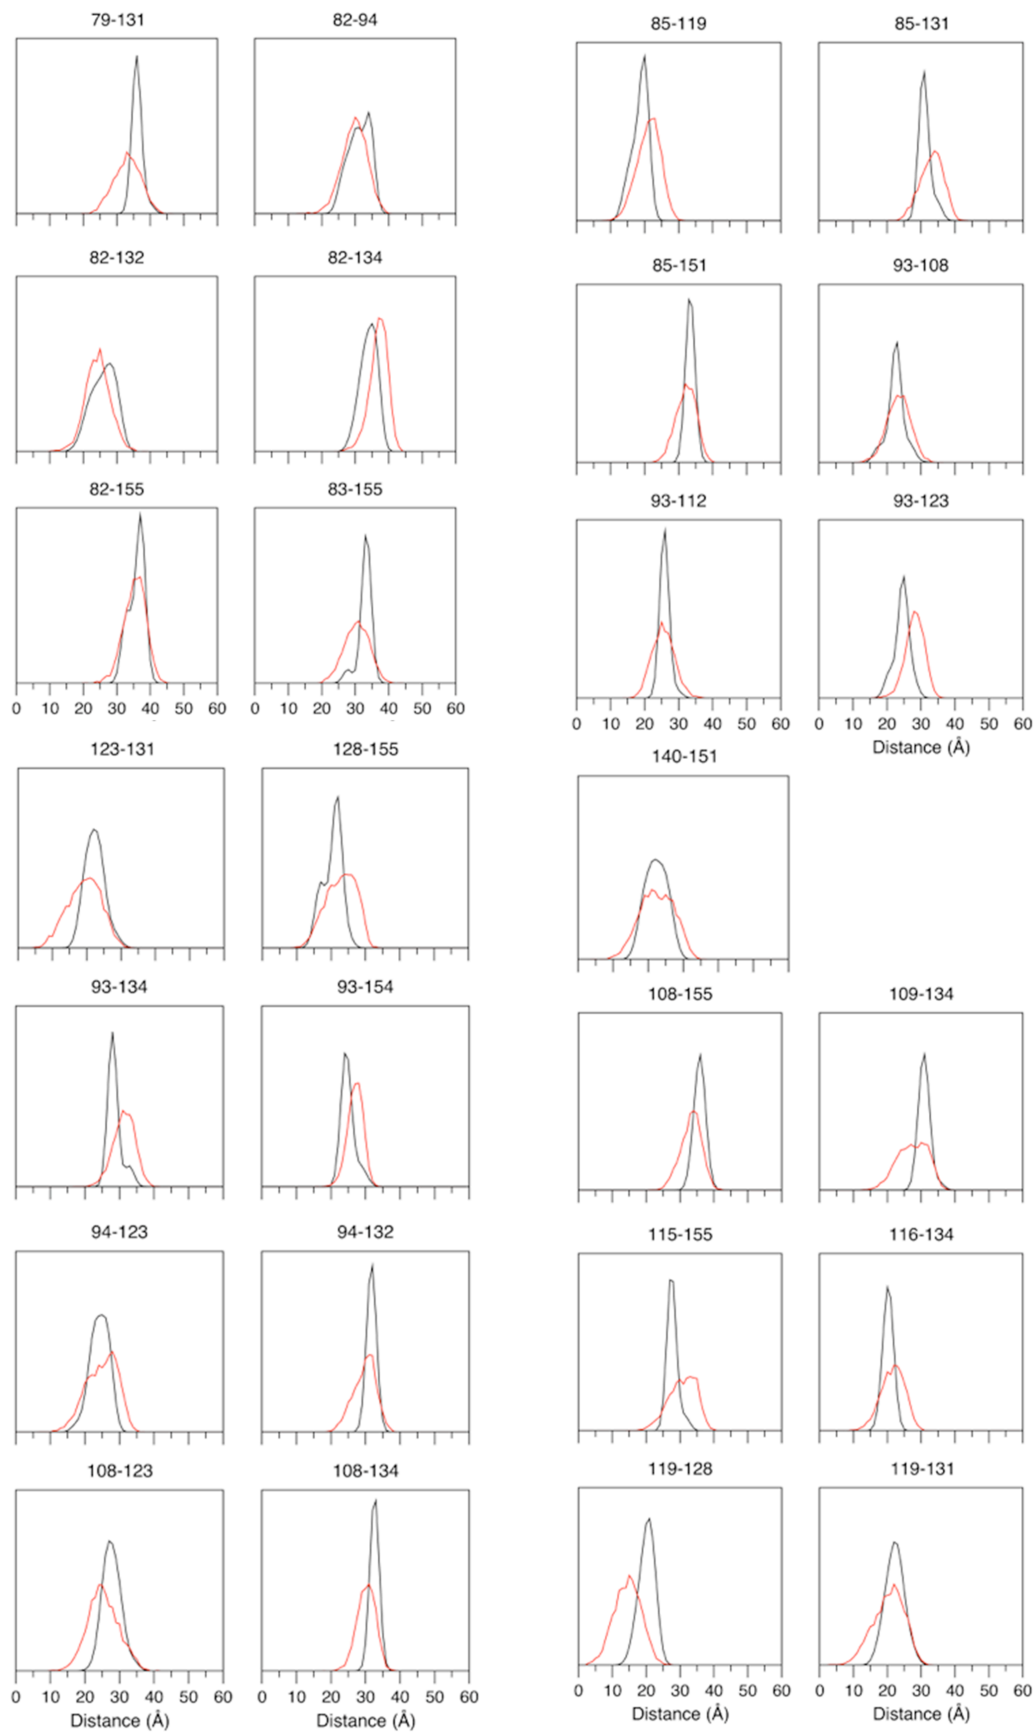

**Table S1:** Average spin-pair distances (Å) obtained from DEER, MDDS and MMM and the C $\alpha$ -C $\alpha$  distances (Å) obtained from the T4 lysozyme X-ray crystal structure.

| Spin-pairs | DEER  | MDDS  | MMM   | CA-CA |
|------------|-------|-------|-------|-------|
| 59/159     | 41.12 | 37.60 | 38.21 | 31.25 |
| 60/90      | 37.48 | 39.66 | 43.26 | 35.30 |
| 60/94      | 25.54 | 22.34 | 33.37 | 27.05 |
| 60/109     | 35.15 | 35.76 | 34.31 | 29.35 |
| 60/154     | 34.08 | 34.26 | 39.74 | 33.52 |
| 61/128     | 46.23 | 48.94 | 49.08 | 40.95 |
| 61/135     | 43.92 | 47.53 | 45.68 | 37.66 |
| 62/109     | 29.53 | 32.43 | 30.62 | 26.89 |
| 62/123     | 42.31 | 48.63 | 48.17 | 40.12 |
| 62/134     | 41.06 | 41.57 | 45.48 | 34.46 |
| 62/155     | 41.22 | 43.38 | 42.61 | 34.35 |
| 64/122     | 34.05 | 32.45 | 37.64 | 32.23 |
| 65/76      | 23.18 | 17.59 | 17.69 | 16.80 |
| 65/135     | 45.58 | 45.23 | 41.94 | 34.30 |
| 72/119     | 28.02 | 30.63 | 32.75 | 24.65 |
| 72/131     | 35.57 | 39.66 | 37.02 | 29.18 |
| 72/151     | 31.71 | 33.54 | 31.26 | 23.80 |
| 75/119     | 23.35 | 24.55 | 27.92 | 19.45 |
| 75/131     | 32.76 | 32.09 | 32.59 | 25.13 |
| 75/151     | 30.07 | 25.32 | 27.48 | 20.78 |
| 76/119     | 26.41 | 27.12 | 29.16 | 20.68 |
| 76/131     | 36.52 | 40.02 | 36.17 | 27.76 |
| 76/151     | 36.00 | 36.57 | 33.01 | 24.28 |
| 79/119     | 23.87 | 21.10 | 25.05 | 16.93 |
| 79/131     | 33.06 | 35.46 | 33.17 | 25.81 |
| 82/94      | 30.70 | 32.09 | 28.51 | 21.20 |
| 82/132     | 26.33 | 24.15 | 24.67 | 21.31 |
| 82/134     | 33.89 | 35.22 | 30.77 | 23.68 |
| 82/155     | 35.77 | 35.63 | 33.05 | 25.59 |
| 83/155     | 32.81 | 30.60 | 29.60 | 22.89 |
| 85/119     | 20.01 | 20.18 | 19.06 | 12.28 |
| 85/131     | 31.18 | 34.80 | 30.46 | 22.41 |
| 85/151     | 33.44 | 31.56 | 32.23 | 21.43 |
| 93/108     | 23.28 | 22.86 | 26.44 | 19.11 |
| 93/112     | 26.14 | 24.49 | 29.37 | 19.63 |
| 93/123     | 24.85 | 27.71 | 24.13 | 16.15 |
| 93/134     | 29.15 | 29.99 | 28.54 | 22.03 |
| 93/154     | 25.06 | 26.44 | 21.22 | 13.37 |
| 94/123     | 23.99 | 28.11 | 21.87 | 16.37 |
| 94/132     | 31.73 | 31.19 | 26.76 | 19.55 |
| 108/123    | 27.57 | 25.84 | 26.06 | 20.52 |
| 108/134    | 32.43 | 29.40 | 29.42 | 18.49 |



|         |       |       |       |       |
|---------|-------|-------|-------|-------|
| 108/155 | 35.23 | 34.10 | 31.92 | 23.32 |
| 109/134 | 30.57 | 28.95 | 26.66 | 18.14 |
| 115/155 | 28.30 | 31.52 | 26.43 | 20.60 |
| 116/134 | 20.16 | 20.65 | 17.14 | 11.94 |
| 119/128 | 19.93 | 15.48 | 14.91 | 10.42 |
| 119/131 | 22.34 | 23.84 | 18.05 | 13.20 |
| 123/131 | 22.33 | 22.83 | 18.81 | 14.61 |
| 128/155 | 20.69 | 22.01 | 16.01 | 12.08 |
| 140/151 | 22.20 | 21.61 | 18.66 | 15.54 |

**Figure S7.** Comparison of distance distributions obtained from MDDS (solid lines) and DEER (dashed line) based on the “outward-facing (3TT1)”(blue), “substrate-occluded (2A65)”(green) and “inward-facing (3TT3)”(red) crystal structures of LeuT.

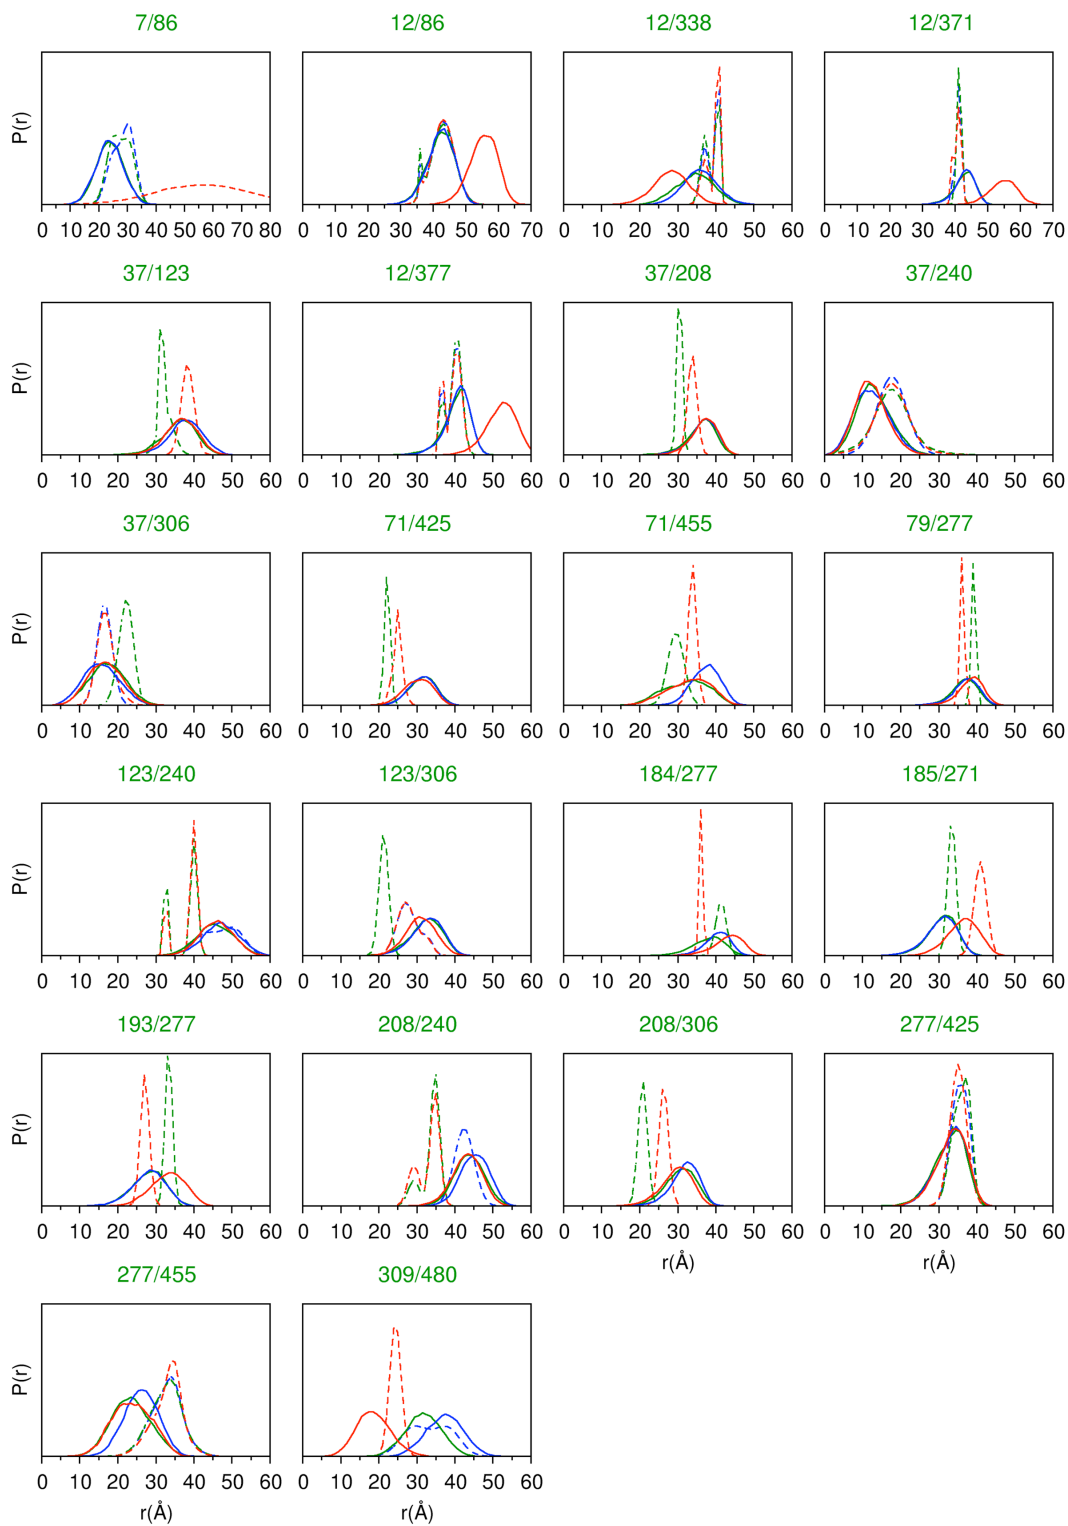

**Figure S8.** Comparison of DEER, MDDS and re-MD distance distributions between the 109-113RX and 127-131RX attached to T4 lysozyme.

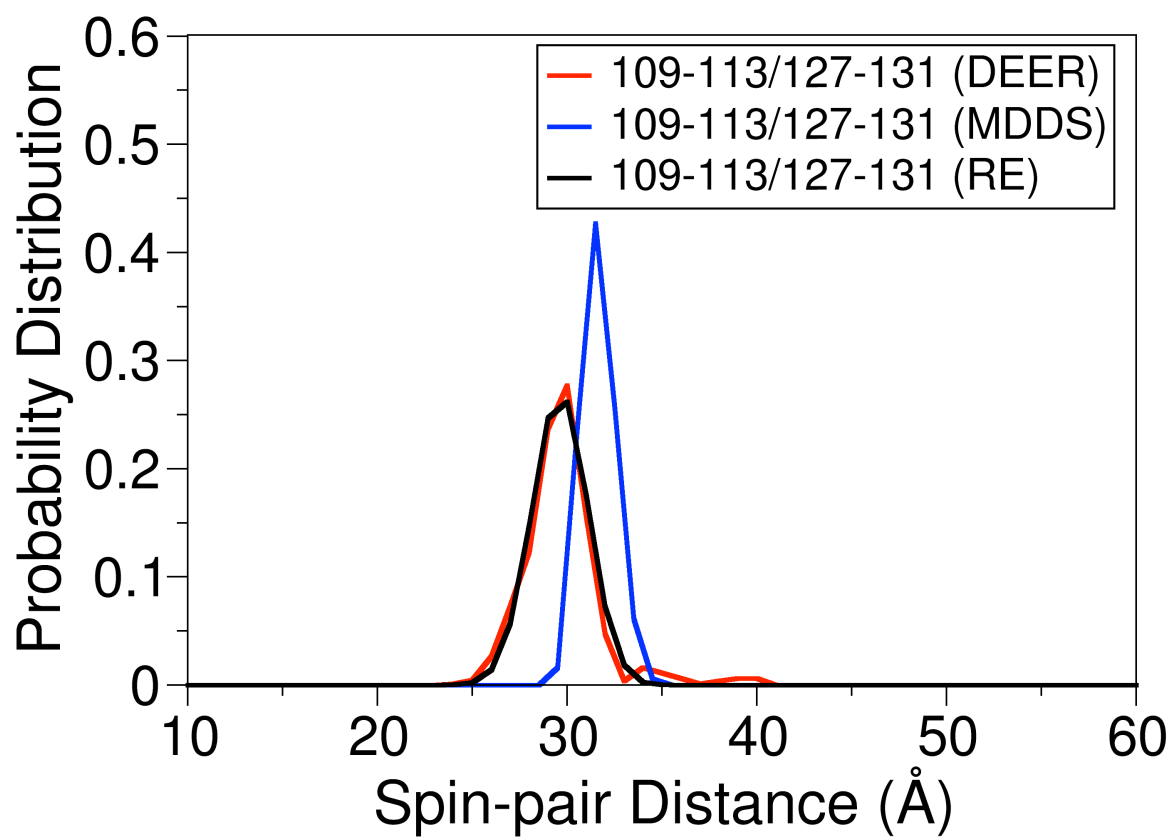

**Figure S9.** Time dependence of the dihedral angles of  $RX_{i,i+4}$  attached to a polyaniline  $\alpha$ -helix obtained from 100ns simulation.

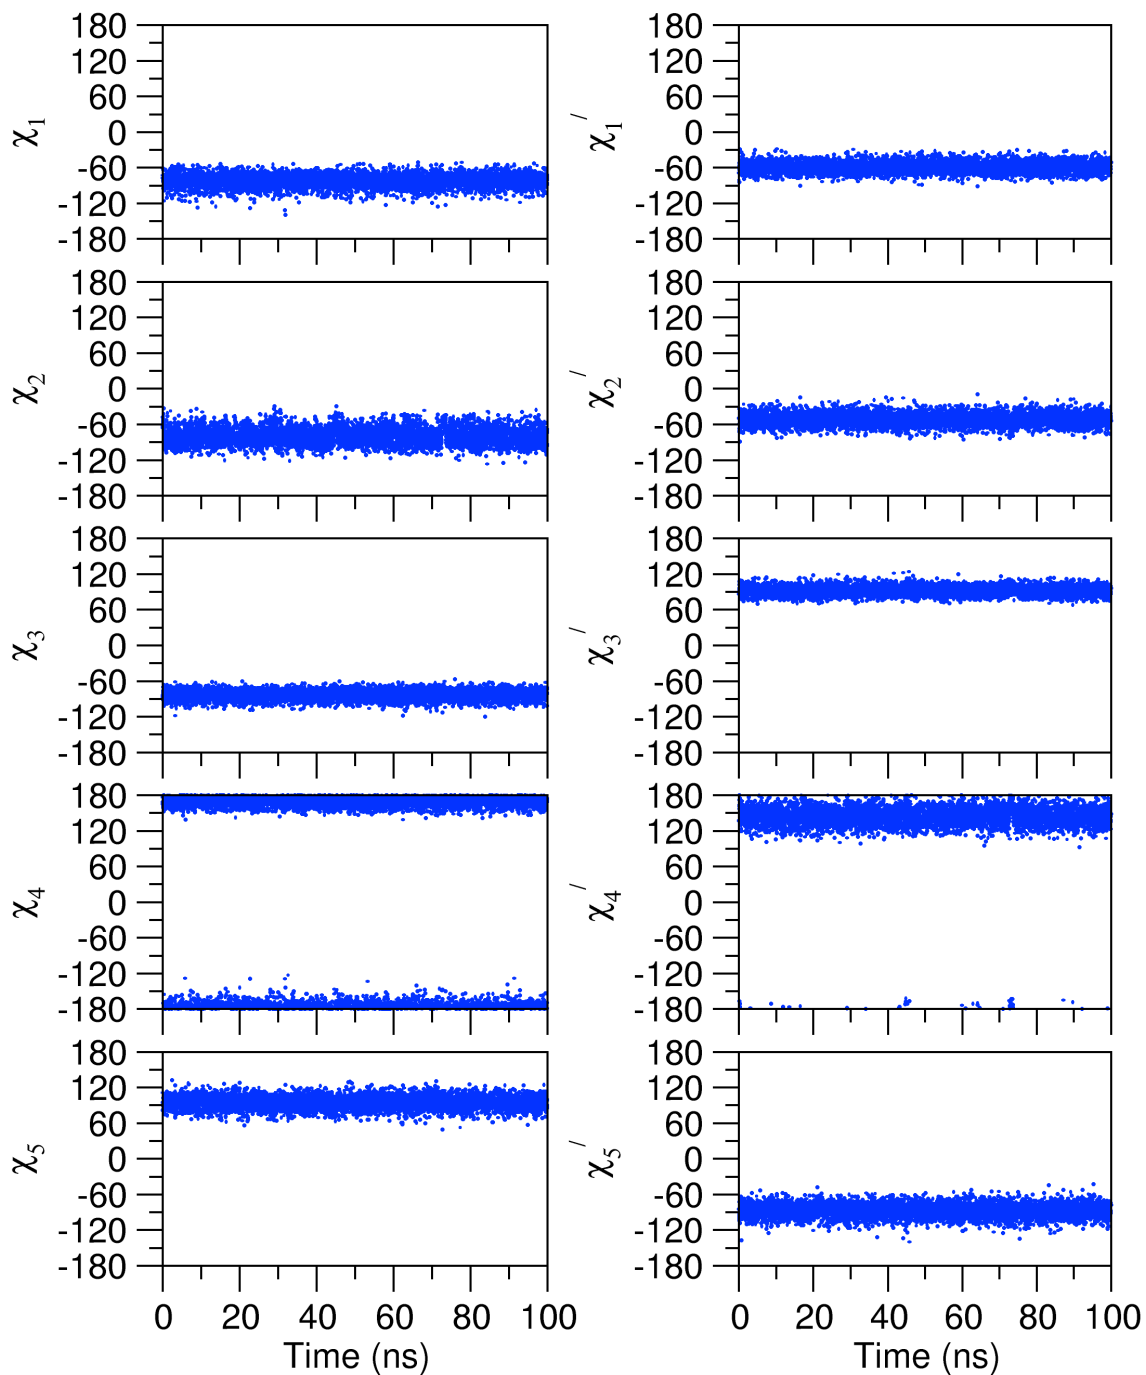

Supplement: jp510745d_si_001.pdf [file jp510745d_si_001.pdf]
